# Supplementary material for: A Miniaturized System for Rapid, Isothermal Detection of SARS-CoV-2 in Human and Environmental Samples
Source: Preprints.org preprint supplement (doi:10.20944/preprints202306.1238.v1), 2023-06-16
Supplement: Supplementary file 1 [file supplementary]

# Appendix A

Data corresponding to Figure 5. Proficiency panel of biosensor sensitivity across SARS-Cov-2 strains in human and environmental samples. The multitude of viral lineages taken from human samples are detailed. The samples listed as Environmental represent a combination of lineages collected through swabbing the local healthcare facilities across Ontario, Canada over a year starting in February 2021.

Table 1. Viral Lineages listed in Figure 5. Proficiency Panel of Biosensor sensitivity across SARS-CoV-2 Strains in human and environmental samples.

| **Sample Type** | **CT Value** | **Lineage** | **Result** |
| --- | --- | --- | --- |
| Alpha B.1.1 | 20.98 | B.1.1.7 | Yes |
| Alpha B.1.1 | 20.85 | B.1.1.7 | Yes |
| Alpha B.1.1 | 24.04 | B.1.1.7 | No |
| Alpha B.1.1 | 24.37 | B.1.1.7 | Yes |
| Alpha B.1.1 | 25.3 | B.1.1.7 | Yes |
| Alpha B.1.1 | 27.0 | B.1.1.7 | No |
| Delta B.1.6 | 27.87 | B.1.617.2 | Yes |
| Delta B.1.6 | 21.19 | B.1.617.2 | Yes |
| Delta B.1.6 | 21.65 | B.1.617.2 | Yes |
| Delta B.1.6 | 21.49 | B.1.617.2 | Yes |
| Delta B.1.6 | 22.81 | B.1.617.2 | Yes |
| Delta B.1.6 | 26.89 | B.1.617.2 | Yes |
| Omicron BA.1 | 23.00 | BA.1.1 | Yes |
| Omicron BA.1 | 21.60 | BA.1.1 | Yes |
| Omicron BA.1 | 25.82 | BA.1.1 | Yes |
| Omicron BA.1 | 18-21 | BA.1 | Yes |
| Omicron BA.1 | 18-21 | BA.1 | No |
| Omicron BA.1 | 18-21 | BA.1 | No |
| Omicron BA.1 | 18-21 | BA.1 | Yes |
| Omicron BA.1 | 18-21 | BA.1 | Yes |
| Omicron BA.1 | 18-21 | BA.1 | Yes |
| Omicron BA.1 | 18-21 | BA.1 | Yes |
| Omicron BA.2 | 18.54 | BA.2 | Yes |
| Omicron BA.2 | 19.67 | BA.2 | Yes |
| Omicron BA.2 | 19.71 | BA.2.10.1 | Yes |
| Omicron BA.2 | 22.98 | BA.2 | Yes |
| Omicron BA.2 | 19.6 | BA.2 | No |
| Omicron BA.2 | 19.45 | BA.2 | Yes |
| Omicron BA.2 | 18.94 | BA.2 | Yes |
| Omicron BA.2 | 21.84 | BA.2 | Yes |
| Omicron BA.2 | 23.97 | BA.2 | Yes |
| Omicron BA.2 | 26.54 | BA.2 | No |
| Omicron BA.2 | 23.31 | BA.2 | Yes |
| Omicron BA.2 | 24.4 | BA.2 | Yes |
| Omicron BA.2 | 25.37 | BA.2 | Yes |
| Omicron BA.2 | 25.51 | BA.2 | Yes |
| **Sample Type** | **CT Value** | **Lineage** | **Result** |
| Omicron BA.2 | 26.82 | BA.2 | Yes |
| Omicron BA.2 | 33.77 | BA.2 | No |
| Omicron BA.4 | 18.39 | BA.4.1 | No |
| Omicron BA.4 | 23.00 | BA.4.1 | Yes |
| Omicron BA.4 | 25.49 | BA.4.6 | Yes |
| Omicron BA.4 | 17.99 | BA.4.1 | Yes |
| Omicron BA.4 | 22.26 | BA.4 | Yes |
| Omicron BA.4 | 16.04 | BA.4.1 | Yes |
| Omicron BA.5 | 17.40 | BA.5.2 | Yes |
| Omicron BA.5 | 21.01 | BA.5.2 | Yes |
| Omicron BA.5 | 17.31 | BA.5.1.1 | Yes |
| Omicron BE.1 | 20.22 | BE.1.1 | Yes |
| Environmental | 30.6 | Mixed Sample, lineage unknown. Pre-Omicron (swabbed Feb 2021) | Yes |
| Environmental | 33.06 | Mixed Sample, lineage unknown. Pre-Omicron (swabbed Sept 2021) | Yes |
| Environmental | 38.13 | Mixed Sample, lineage unknown. Pre-Omicron (swabbed Oct 2021) | No |
| Environmental | 29.26 | Mixed Sample, lineage unknown. Post-Omicron (swabbed Feb 2022) | Yes |
| Environmental | 34.29 | Mixed Sample, lineage unknown. Post-Omicron (swabbed Jan 2022) | Yes |
| Environmental | 39.2 | Mixed Sample, lineage unknown. Post-Omicron (swabbed Jan 2022) | Yes |
